# Supplementary material for: Survival of Human Norovirus Surrogates in Water upon Exposure to Thermal and Non-Thermal Antiviral Treatments
Source: Viruses. 2020 Apr 19;12(4):461. doi: 10.3390/v12040461 (PMC7232373; doi:10.3390/v12040461)
Supplement: Supplementary file 1 [file viruses-12-00461-s001.pdf]

## Supplemental Results

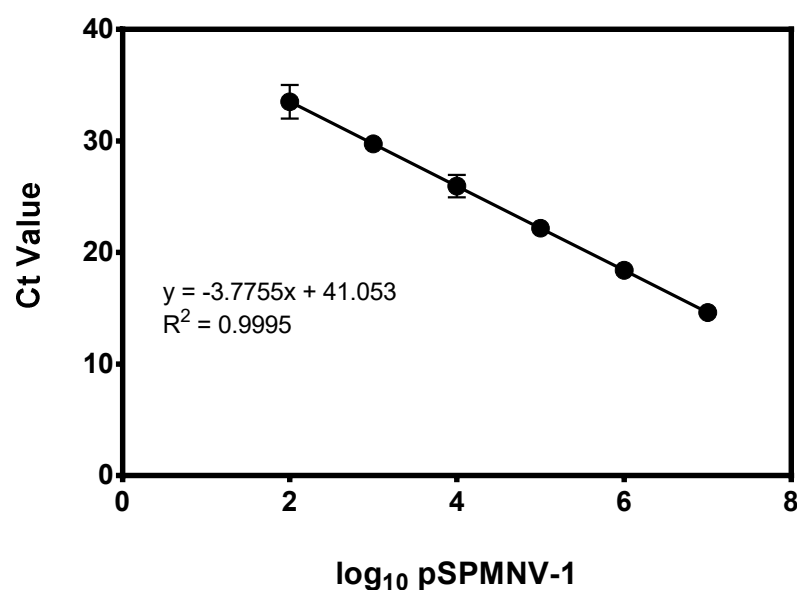

**Figure S1.** Representative standard curve for determining murine norovirus concentration in samples quantified using RT-qPCR. The plasmid pSPMNV-1 was used in qPCR analysis of MNV-1 containing samples to determine virus concentration. Serial dilutions starting from  $10^7$  and ending at  $10^2$  were used to generate the standard curve. Linear regression analysis of this curve resulted in an  $R^2 = 0.9995$ , which was typical for all RT-qPCR runs.

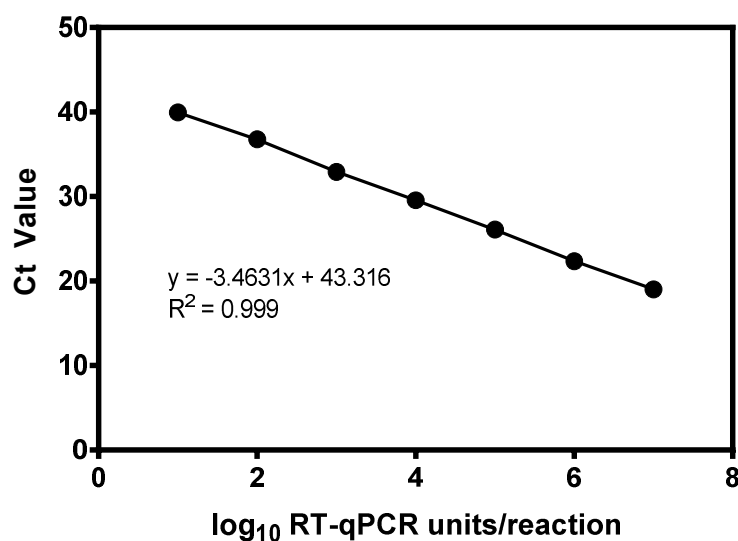

**Figure S2.** Representative standard curve for RT-qPCR quantification of MS2 viral genome in samples. The viral RNA was used for the determination of MS2 in the samples. The amplification signals showed a strong linearity ( $R^2 = 0.999$ ) from  $10^7$  to  $10^1$  RT-qPCR Units.
